# Supplementary material for: Prevention of Dental Caries: A Review on the Improvements of Toothpaste Formulations from 1900 to 2023
Source: MDPI journal article supplement (doi:10.3390/dj12030064), 2024-03-04
Supplement: s1 [file s1]

**Table S1.** Search results for patent applications in the field of toothpastes (Espacenet, January 2, 2024).

| Ingredient: Decade | Calcium Carbonate | Calcium Phosphate | Hydrated Silica | Sodium Fluoride | Sodium Lauryl Sulfate | Triclosan | Xylitol | Zinc salts |
|--------------------|-------------------|-------------------|-----------------|-----------------|-----------------------|-----------|---------|------------|
| 1900–1909          | 6                 | 0                 | 0               | 0               | 0                     | 0         | 0       | 0          |
| 1910–1919          | 16                | 5                 | 0               | 1               | 0                     | 0         | 0       | 0          |
| 1920–1929          | 40                | 10                | 0               | 0               | 0                     | 0         | 0       | 2          |
| 1930–1939          | 48                | 15                | 0               | 0               | 2                     | 0         | 0       | 4          |
| 1940–1949          | 30                | 9                 | 1               | 1               | 4                     | 0         | 0       | 3          |
| 1950–1959          | 91                | 36                | 4               | 19              | 44                    | 0         | 2       | 5          |
| 1960–1969          | 160               | 68                | 10              | 109             | 149                   | 1         | 1       | 29         |
| 1970–1979          | 820               | 435               | 160             | 486             | 753                   | 1         | 67      | 179        |
| 1980–1989          | 1487              | 1063              | 445             | 854             | 1275                  | 22        | 432     | 534        |
| 1990–1999          | 2013              | 1227              | 957             | 1564            | 2132                  | 802       | 1098    | 711        |
| 2000–2009          | 3868              | 2449              | 2399            | 2423            | 4429                  | 2367      | 3050    | 1658       |
| 2010–2019          | 5984              | 3434              | 4099            | 3056            | 6360                  | 2707      | 5084    | 2431       |
| 2020–2023          | 3004              | 1873              | 2200            | 1468            | 2814                  | 1173      | 2744    | 1294       |

**Table S2.** Search results for toothpaste products (Mintel, January 2, 2024).

| Ingredient: Years | Calcium Carbonate | Calcium Phosphate | Hydrated Silica | Sodium Fluoride | Sodium Lauryl Sulfate | Triclosan | Xylitol | Zinc Salts | Hydroxyapatite |
|-------------------|-------------------|-------------------|-----------------|-----------------|-----------------------|-----------|---------|------------|----------------|
| 1996–1999         | 17                | 6                 | 74              | 72              | 75                    | 24        | 13      | 16         | 0              |
| 2000–2003         | 177               | 94                | 791             | 709             | 918                   | 264       | 92      | 136        | 3              |
| 2004–2007         | 384               | 131               | 1735            | 1576            | 1960                  | 384       | 201     | 270        | 17             |
| 2008–2011         | 634               | 296               | 2381            | 2018            | 2586                  | 336       | 375     | 378        | 56             |
| 2012–2015         | 802               | 343               | 3589            | 2865            | 3622                  | 360       | 576     | 782        | 129            |
| 2016–2019         | 1294              | 652               | 6346            | 4921            | 5419                  | 314       | 1347    | 1399       | 379            |
| 2020–2023         | 1544              | 857               | 7521            | 5658            | 5838                  | 38        | 2044    | 1696       | 558            |

**Table S3.** Search results for toothpaste products in Germany and the development of caries prevalence in 12-year-olds in Germany [18] (Mintel, January 2, 2024).

| Ingredient: Decade | Calcium Carbonate | Calcium Phosphate | Hydrated Silica | Sodium Fluoride | Sodium Lauryl Sulfate | Triclosan | Xylitol | Zinc Salts | Caries Prevalence/% (Germany) |
|--------------------|-------------------|-------------------|-----------------|-----------------|-----------------------|-----------|---------|------------|-------------------------------|
| 1997               | 0                 | 0                 | 0               | 0               | 0                     | 0         | 0       | 0          | 58.2                          |
| 1998               | 0                 | 0                 | 1               | 0               | 1                     | 0         | 0       | 0          |                               |
| 1999               | 1                 | 1                 | 11              | 12              | 9                     | 3         | 1       | 3          |                               |
| 2000               | 0                 | 1                 | 13              | 10              | 10                    | 5         | 0       | 3          |                               |
| 2001               | 1                 | 0                 | 7               | 4               | 3                     | 3         | 0       | 2          |                               |
| 2002               | 1                 | 2                 | 7               | 9               | 8                     | 1         | 1       | 1          |                               |
| 2003               | 0                 | 0                 | 8               | 8               | 5                     | 1         | 0       | 2          |                               |
| 2004               | 0                 | 0                 | 11              | 9               | 8                     | 1         | 1       | 2          | 29.9                          |
| 2005               | 0                 | 2                 | 17              | 12              | 12                    | 1         | 1       | 5          |                               |
| 2006               | 1                 | 0                 | 18              | 13              | 13                    | 1         | 1       | 2          |                               |
| 2007               | 0                 | 1                 | 19              | 15              | 9                     | 3         | 1       | 3          |                               |
| 2008               | 0                 | 1                 | 16              | 13              | 10                    | 0         | 0       | 2          |                               |
| 2009               | 4                 | 0                 | 29              | 29              | 19                    | 2         | 1       | 4          |                               |
| 2010               | 0                 | 5                 | 23              | 19              | 11                    | 0         | 3       | 6          |                               |
| 2011               | 1                 | 1                 | 23              | 23              | 14                    | 2         | 3       | 6          |                               |
| 2012               | 3                 | 1                 | 49              | 44              | 26                    | 2         | 5       | 12         |                               |
| 2013               | 1                 | 1                 | 42              | 41              | 27                    | 1         | 2       | 11         |                               |
| 2014               | 1                 | 3                 | 32              | 23              | 15                    | 0         | 4       | 11         | 18.7                          |
